# Supplementary material for: Sex-specific Risk Factors for Survival in B-cell Non-Hodgkin Lymphoma Patients after Anti-CD19 CAR T-Cell Therapy
Source: bioRxiv or medRxiv preprint supplement (doi:10.1101/2024.12.12.24318935), 2024-12-13
Supplement: Supplementary file [file media-1.pdf]

**Supplemental Materials for: Sex-specific Risk Factors for Survival in B-cell Non-Hodgkin Lymphoma Patients after Anti-CD19 CAR T-Cell Therapy**

Manishkumar S. Patel<sup>1</sup>, Agrima Mian<sup>2</sup>, Akansha Jalota<sup>1</sup>, Peter Bazeley<sup>3</sup>, Sujata Patil<sup>3,4</sup>, Brian T. Hill<sup>2</sup>, and Neetu Gupta<sup>1</sup>

<sup>1</sup>Department of Inflammation and Immunity, Lerner Research Institute; <sup>2</sup>Department of Hematology and Medical Oncology, Taussig Cancer Institute; <sup>3</sup>Department of Quantitative Health Sciences, Lerner Research Institute; <sup>4</sup>Department of Cancer Biostatistics, Taussig Cancer Institute, Cleveland Clinic, Cleveland, OH

**Correspondence to:** Neetu Gupta, Ph.D.; 9500 Euclid Avenue, NE40, Cleveland, OH 44195;  
Email: [guptan@ccf.org](mailto:guptan@ccf.org); Phone: (216) 444-7455; Fax: (216) 444-9329

**Running Title:** Sex-specific risk factors in CAR T-cell therapy

**Keywords:** CAR T-cells, survival, sex, cytokines, tumor burden

# Supplemental Figure 1

A

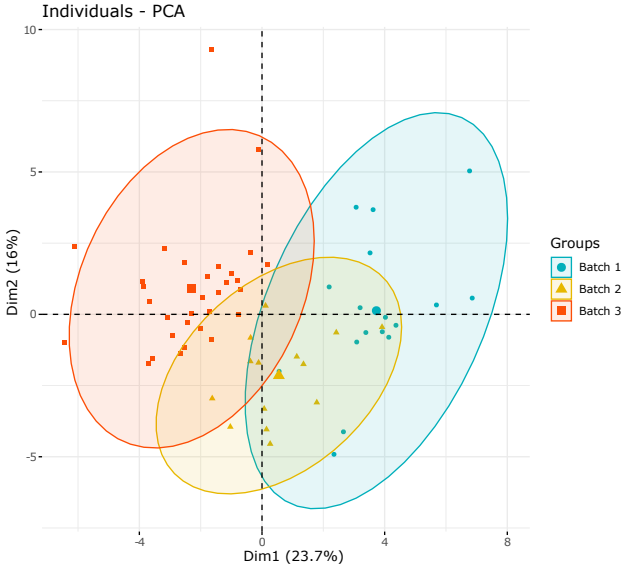

B

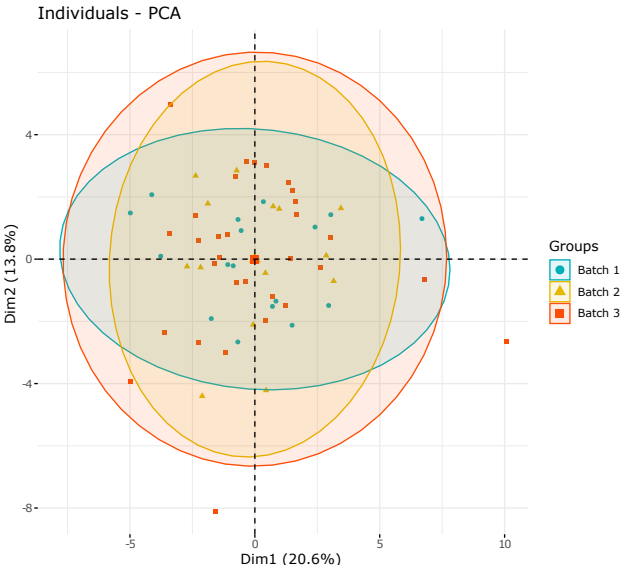

**Supplemental Figure 1. Principal component analysis of all samples quantified in three different batches. (A) Before batch correction, (B) After batch correction.**

## Supplemental Figure 2

A

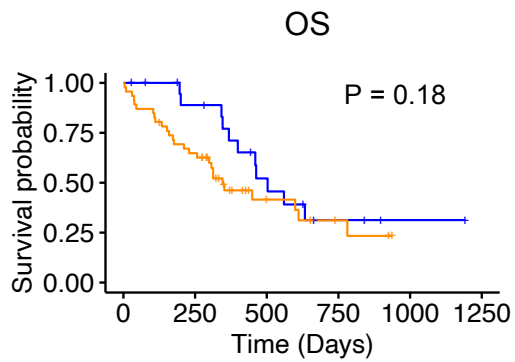

Number at risk

|   |    |    |   |   |   |   |
|---|----|----|---|---|---|---|
| — | 21 | 16 | 8 | 3 | 1 | 0 |
| — | 46 | 29 | 8 | 4 | 0 | 0 |

— Females — Males

B

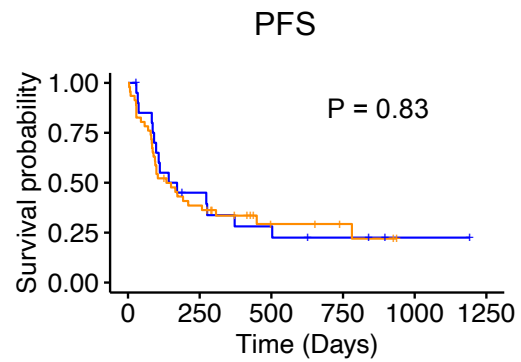

Number at risk

|   |    |    |   |   |   |   |
|---|----|----|---|---|---|---|
| — | 21 | 8  | 5 | 3 | 1 | 0 |
| — | 46 | 17 | 6 | 4 | 0 | 0 |

— Females — Males

C

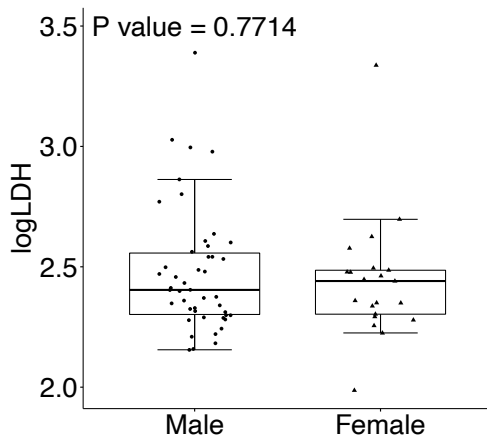

D

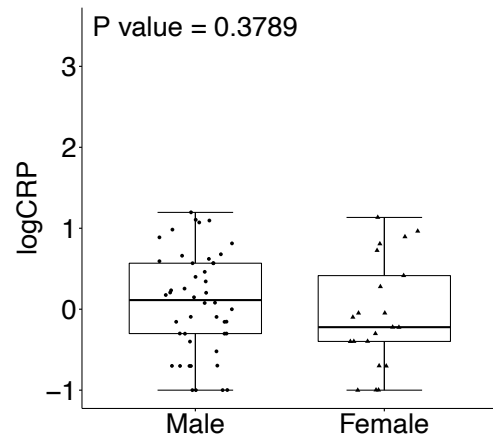

**Supplemental Figure 2. Survival, tumor burden and CRP in male and female LBCL patients.** Kaplan Meier analysis of OS (**A**), and PFS (**B**), and pre-treatment relative abundance of LDH (**C**), and CRP (**D**) in male and female patients. Males, n=46; Females, n=21. Yes, n=45; Kym, n=22.

### Supplemental Figure 3

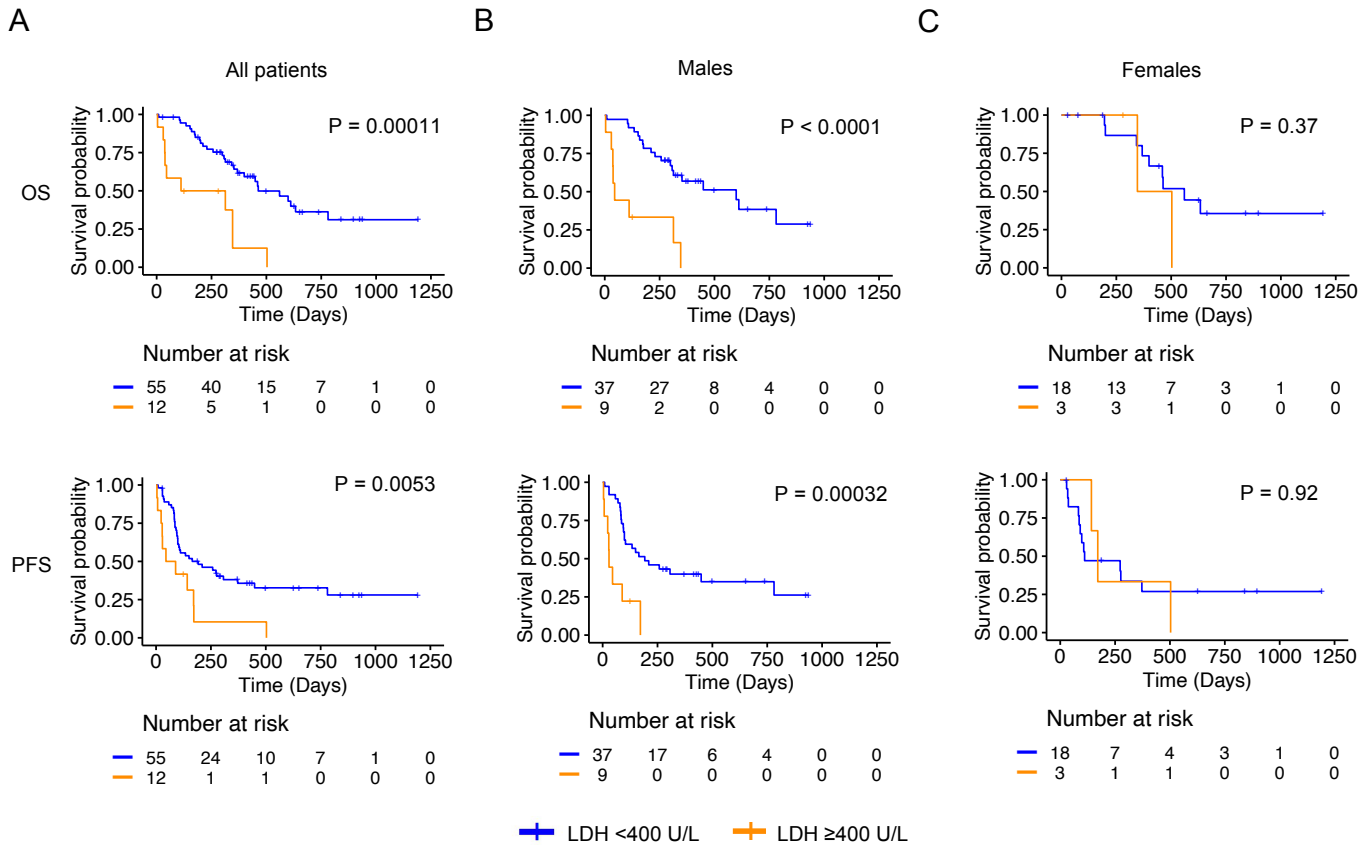

**Supplemental Figure 3. Male patients with higher pre-treatment tumor burden show poorer survival after treated with anti-CD19 CAR T-cells.** Association of baseline LDH levels with overall survival (OS), and progression-free survival (PFS) in both male and female (A), only male (B), or only female (C), LBCL patients. P<0.05; Males, n=46; Females, n=21; Yes, n=45; Kym, n=22. LDH cut-off, 400 U/l.

## Supplemental Figure 4

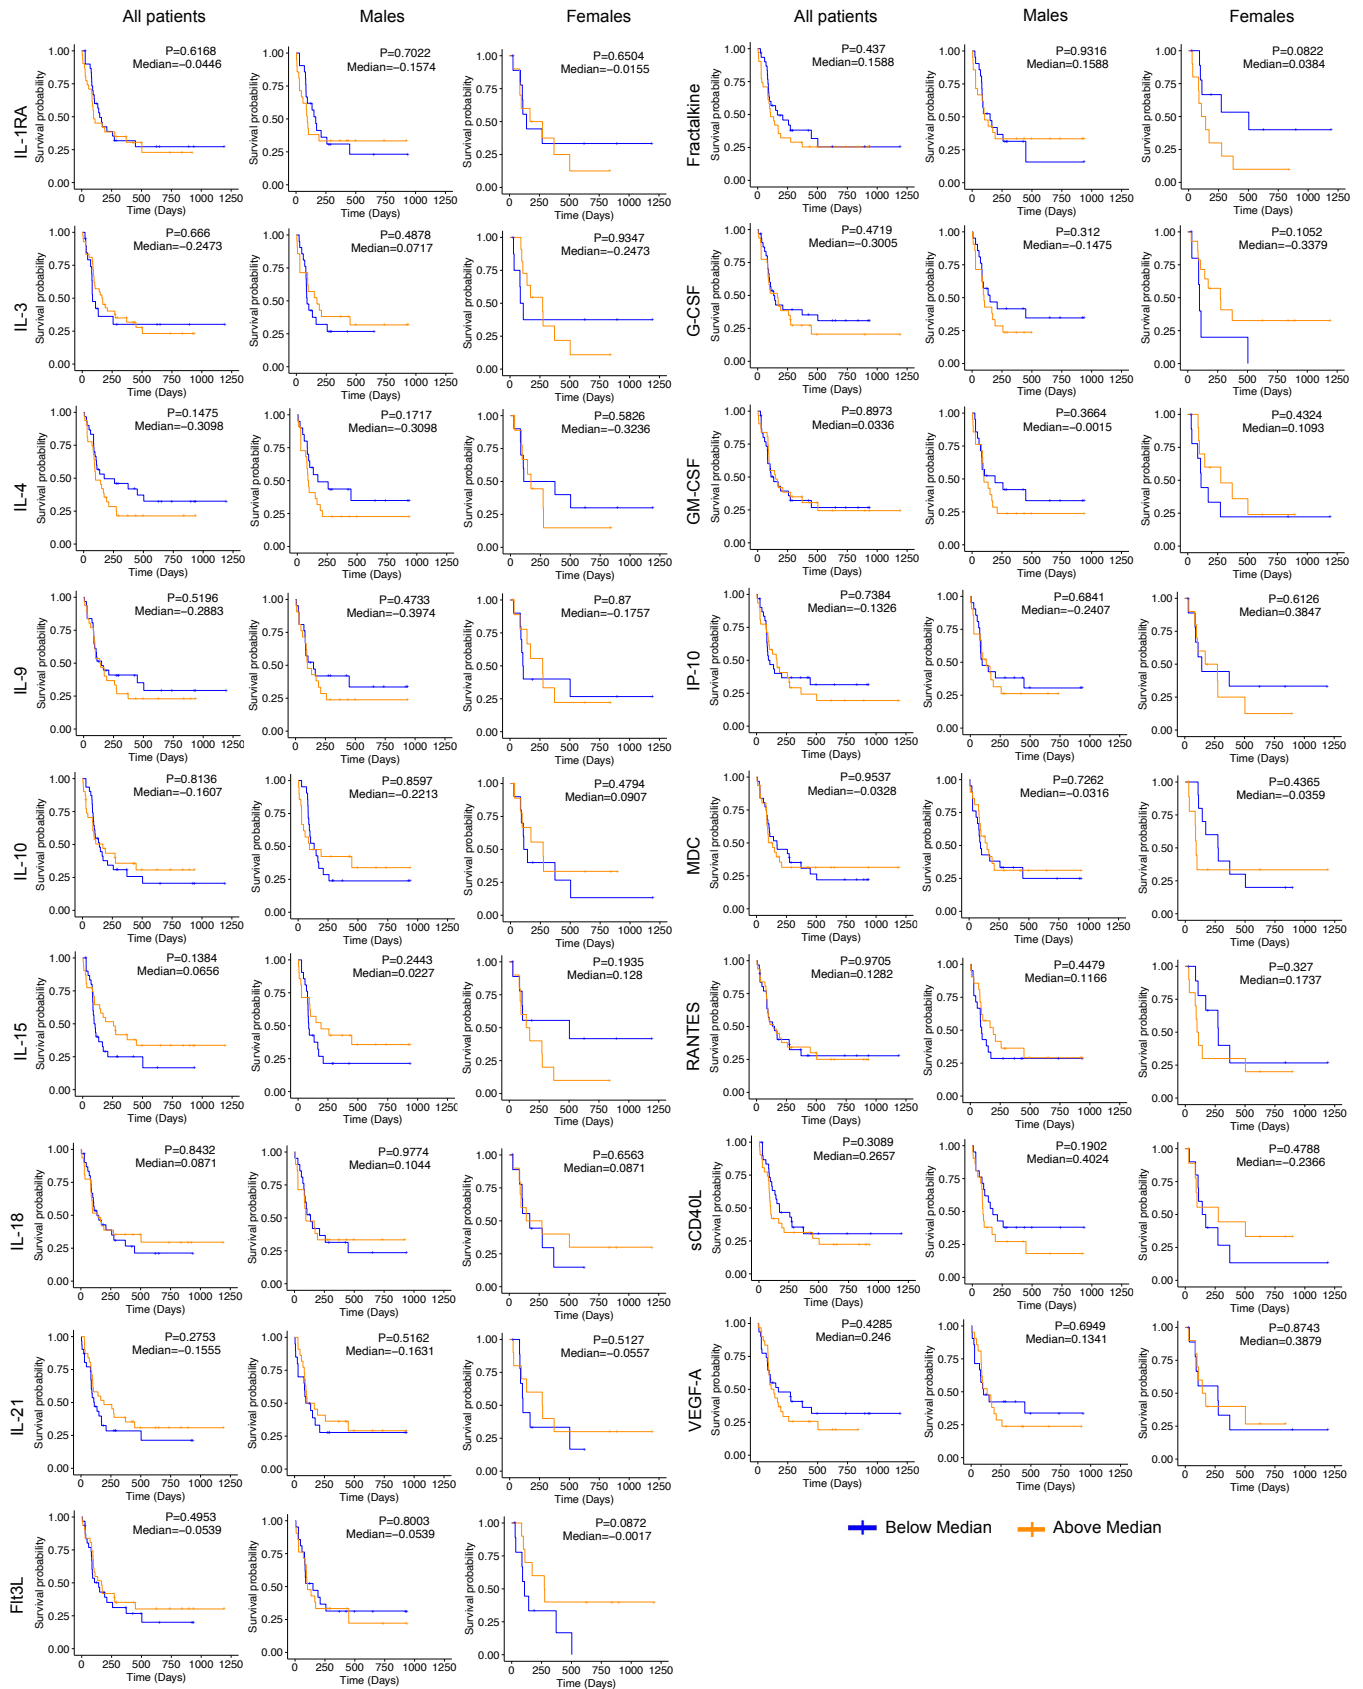

**Supplemental Figure 4. Lack of association between the relative abundance of a subset of cytokines/chemokines and PFS in LBCL patients receiving anti-CD19 CAR T-cell therapy.** Association between relative abundance of the indicated cytokines and PFS in all, male or female LBCL patients. ( $P < 0.05$ ), Males,  $n=42$ ; Females,  $n=20$ ; Yes,  $n=42$ ; Kym,  $n=20$ .

## Supplemental Figure 5

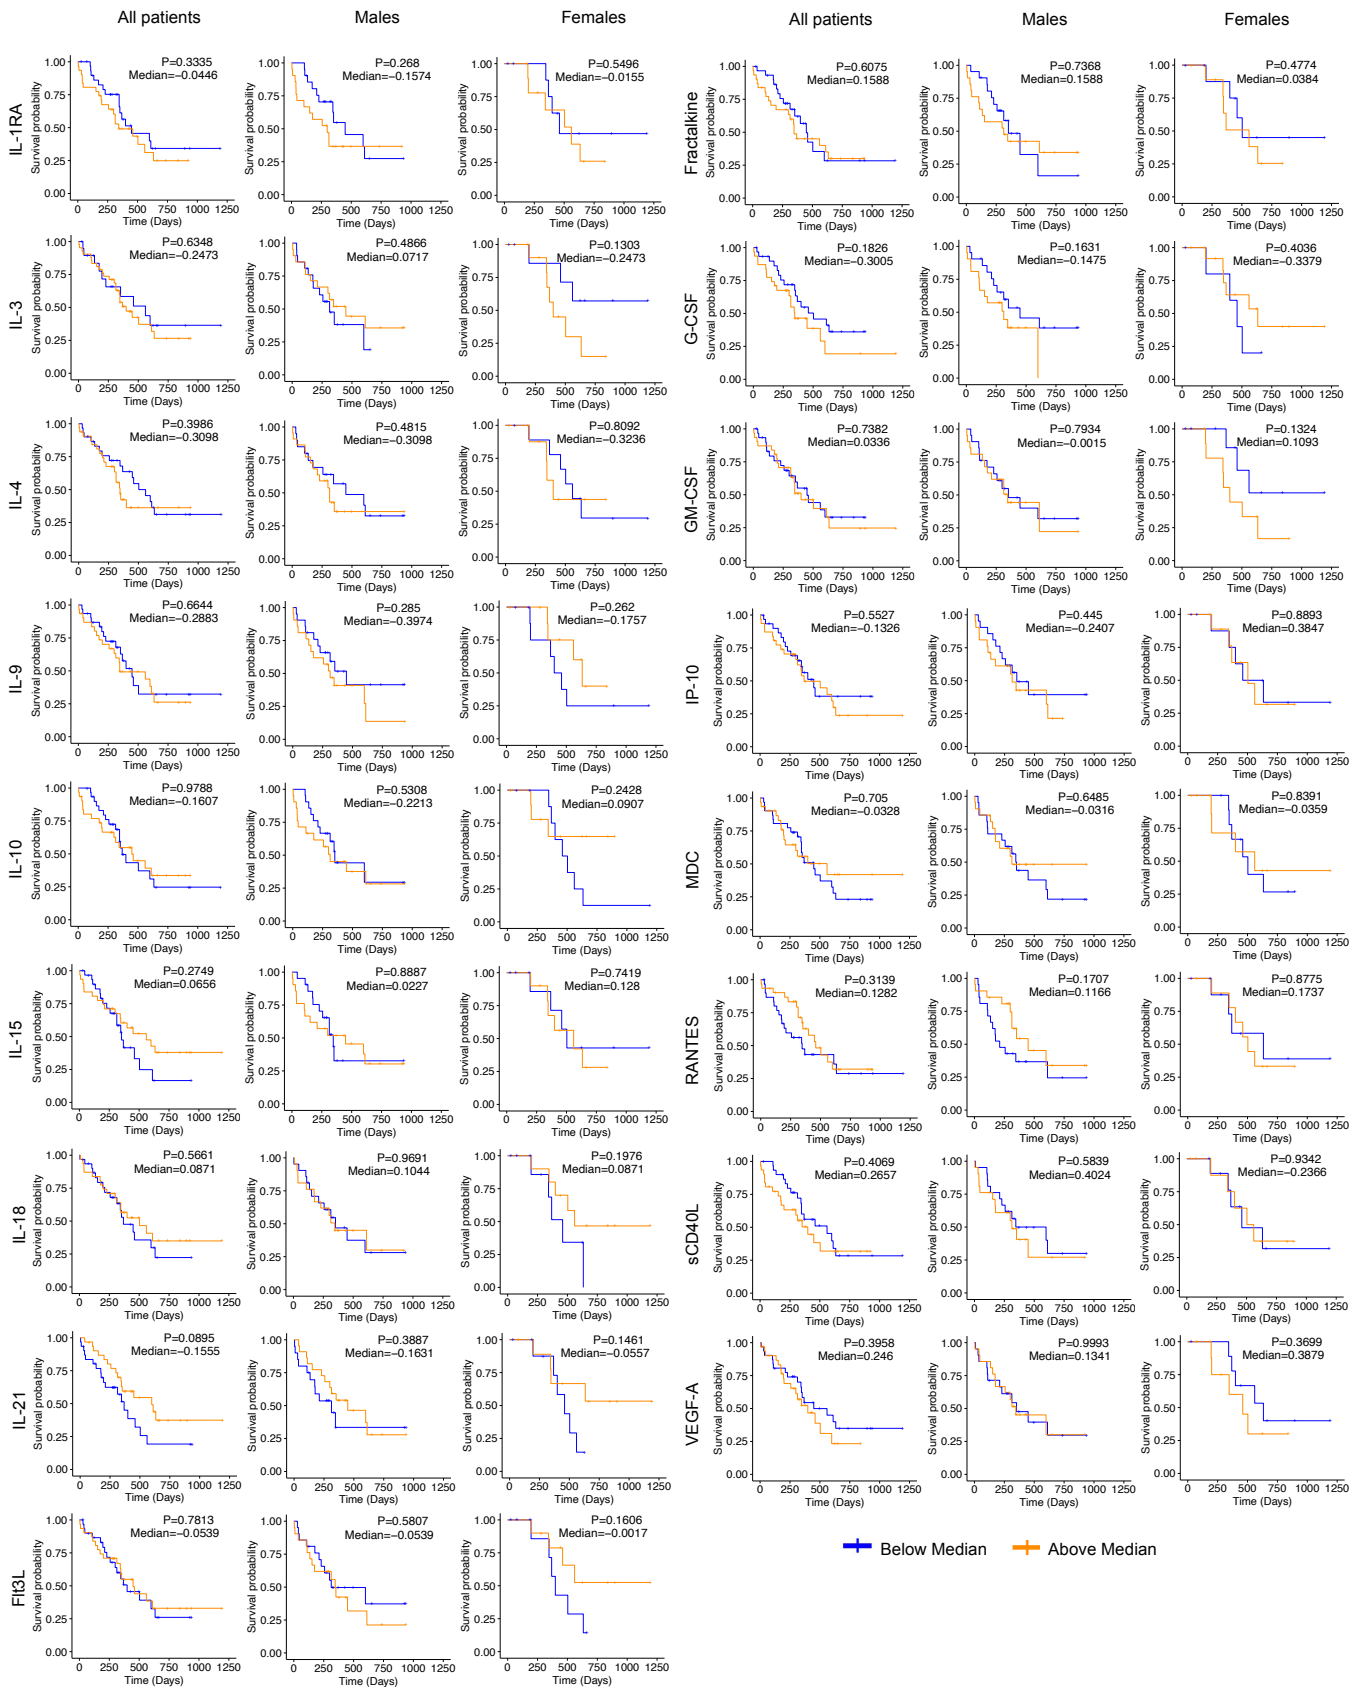

**Supplemental Figure 5. Lack of association between the relative abundance of a subset of cytokines/chemokines and OS in LBCL patients receiving anti-CD19 CAR T-cell therapy.** Association between relative abundance of the indicated cytokines and OS in all, male or female LBCL patients. ( $P < 0.05$ ), Males,  $n=42$ ; Females,  $n=20$ ; Yes,  $n=42$ ; Kym,  $n=20$ .
